# Supplementary material for: Fabrication of microporous layer – free hierarchical gas diffusion electrode as a low Pt-loading PEMFC cathode by direct growth of helical carbon nanofibers
Source: Royal Society of Chemistry journal article supplement (doi:10.1039/c8ra07569g), 2018-01-01
Supplement: c8ra07569g1.pdf [file c8ra07569g1.pdf]

## Supporting information

### Fabrication of microporous layer – free hierarchy gas diffusion electrode as a low Pt-loading PEMFC cathode by direct growth of helical carbon nanofibers

Robin Sandström<sup>a</sup>, Joakim Ekspong<sup>a</sup>, Alagappan Annamalai<sup>a</sup>, Tiva Sharifi<sup>a, b</sup>, Alexey Klechikov<sup>a</sup>, Thomas Wågberg<sup>a,\*</sup>

<sup>a</sup>Department of Physics, Umeå University, Umeå 90187, Sweden

<sup>b</sup>Department of Materials Science and NanoEngineering, Rice University, Houston, TX, USA.

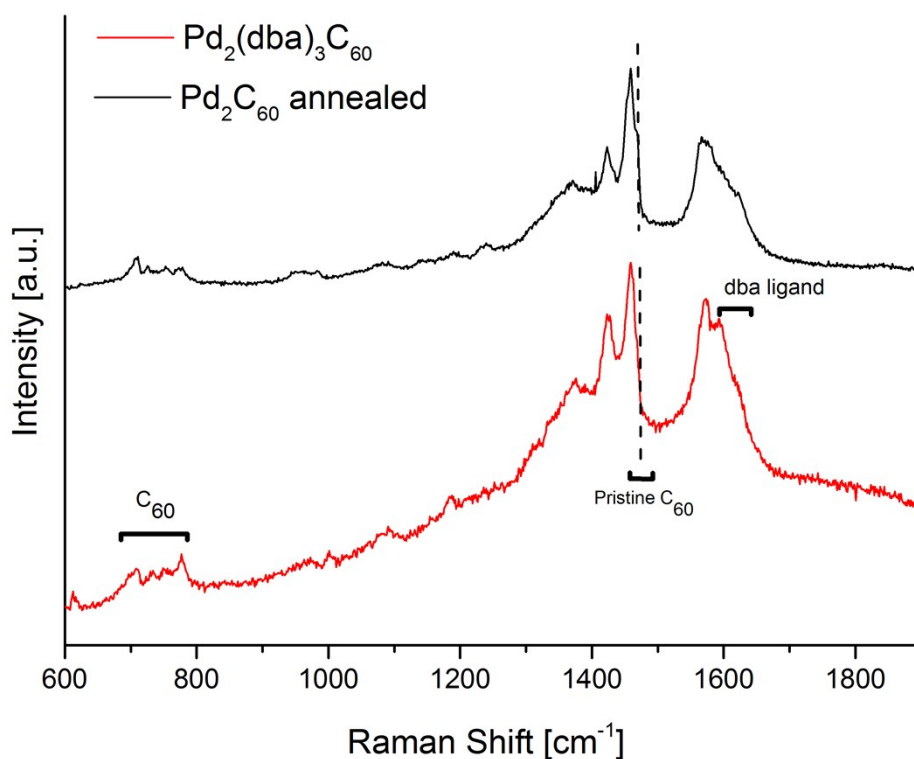

**Fig. S1.** Raman spectra of the Pd<sub>2</sub>C<sub>60</sub> decorated carbon paper. A downshift in the C<sub>60</sub> breathing mode evidences formation of Pd<sub>2</sub>C<sub>60</sub> phase already in the sonicated Pd<sub>2</sub>(dba)<sub>3</sub>C<sub>60</sub> mixture. In addition, a removal of dba ligands due to thermal annealing at 200°C is observed. The full mechanism of this process is detailed elsewhere[1].

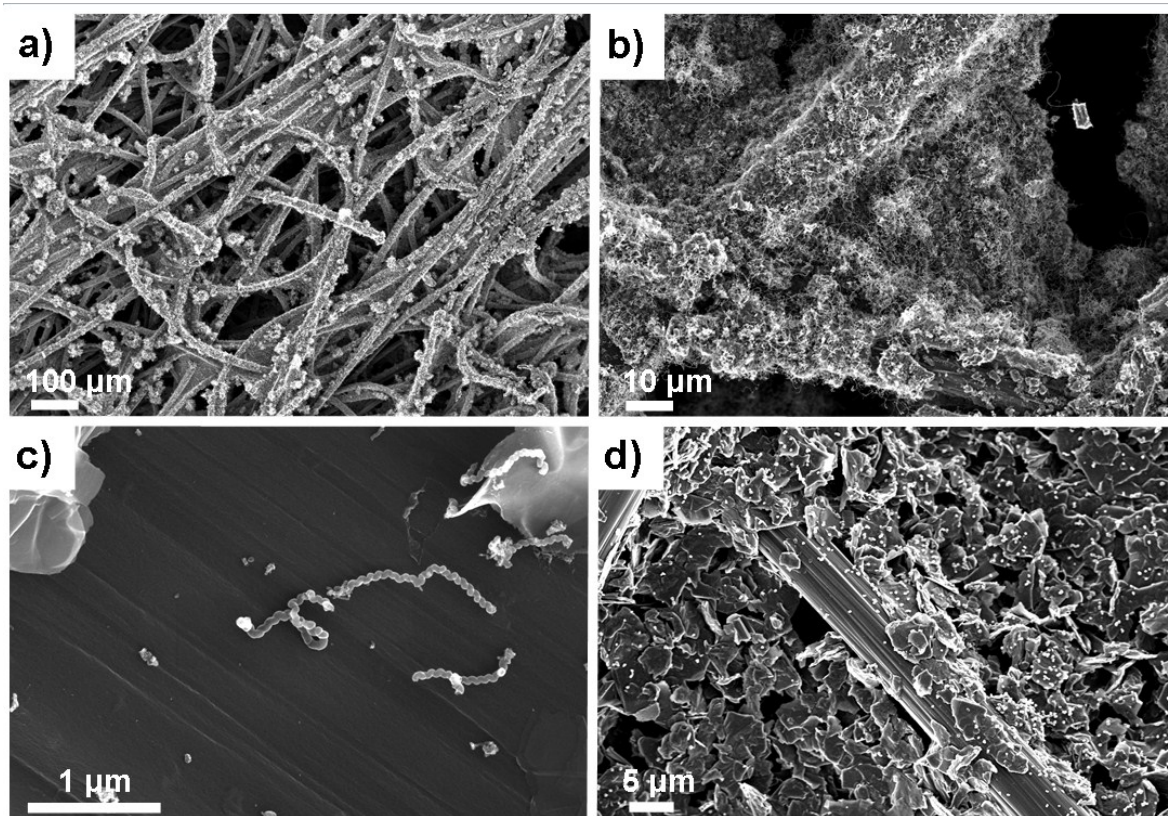

**Fig. S2.** Additional SEMs displaying morphologies of CP-HCNFs in the case where a surplus of Pd catalyst was applied (a-b) and the initial stages of the growth is illustrated in (c). Pt traces could be observed on the other side of the CP (d) after Pt autoclave decoration.

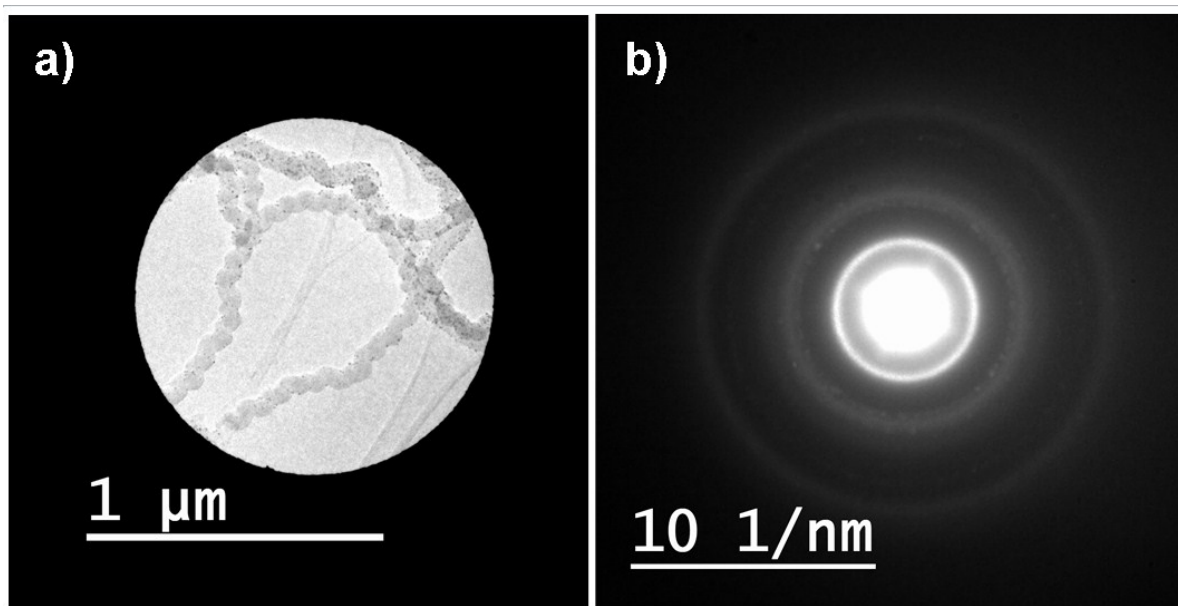

**Fig. S3.** Intermediate lens aperture aimed at a selected Pt-HCNF cluster (a) and its corresponding Selected area electron diffraction (b) displaying crystalline Pt NPs .

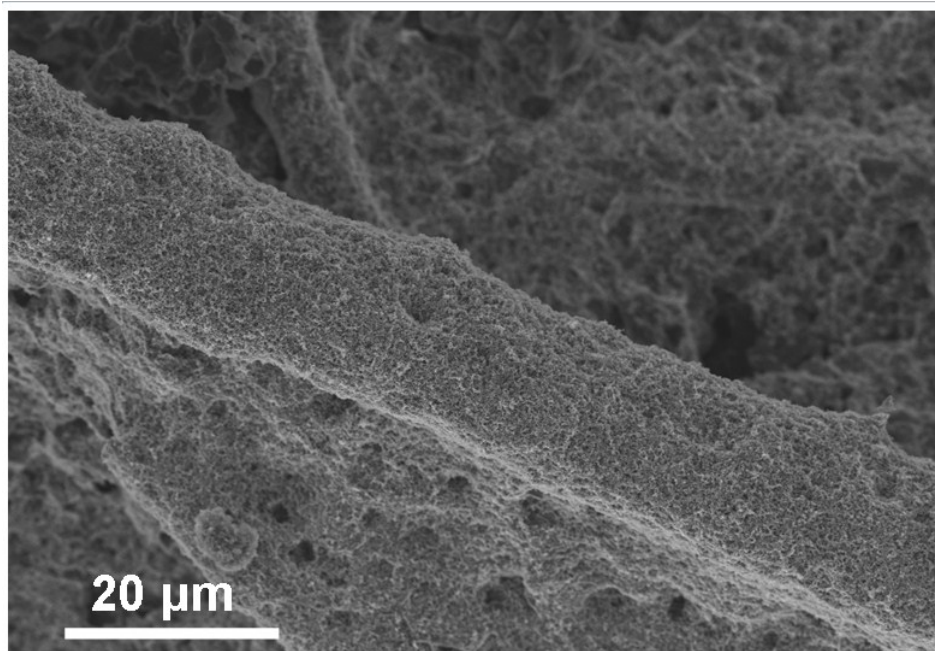

**Fig. S4.** SEM of commercial Pt/C – Vulcan (20%) decorated on type 34 AA GDL by spraycoating. The Pt loading is similar to the fabricated Pt/HCNF GDL ( $0.05 \text{ mg}_{\text{Pt}} \text{ cm}^{-2}$ ).

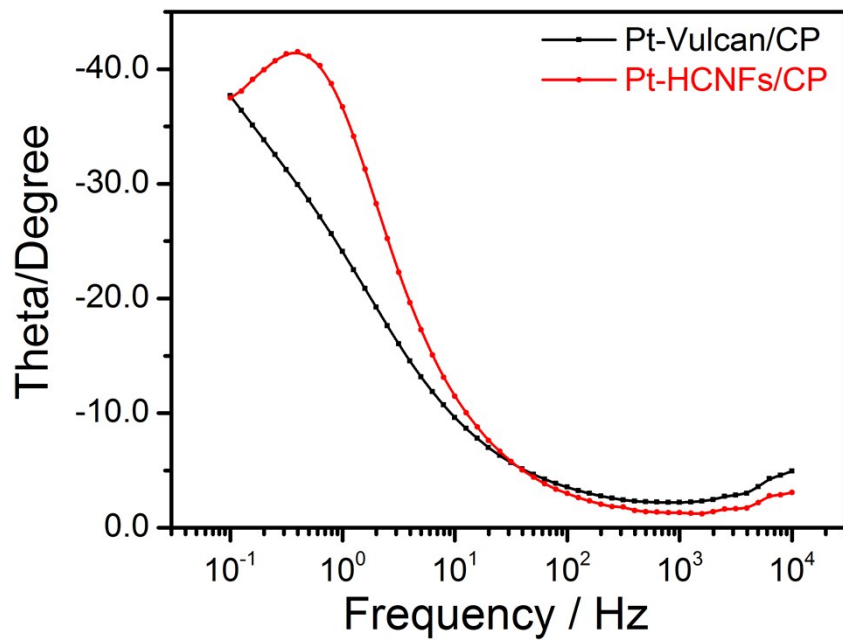

**Fig. S5.** Bode phase plot corresponding to the EIS measurements performed (see Fig. 6 a).

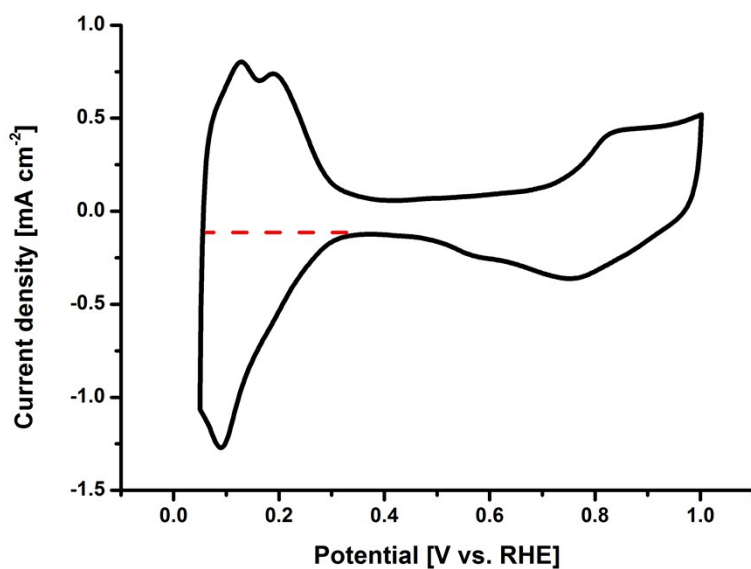

**Fig. S6.** Hydrogen under potential deposition ECSA test of Pt/C – Vulcan (20%) performed on a conventional glassy carbon electrode on Ar saturated 0.1 M  $\text{HClO}_4$  electrolyte. For comparison purposes, the Nafion® amount was set to 33 wt.%, yielding an ECSA of  $68 \text{ m}^2/\text{g}_{\text{Pt}}$ .

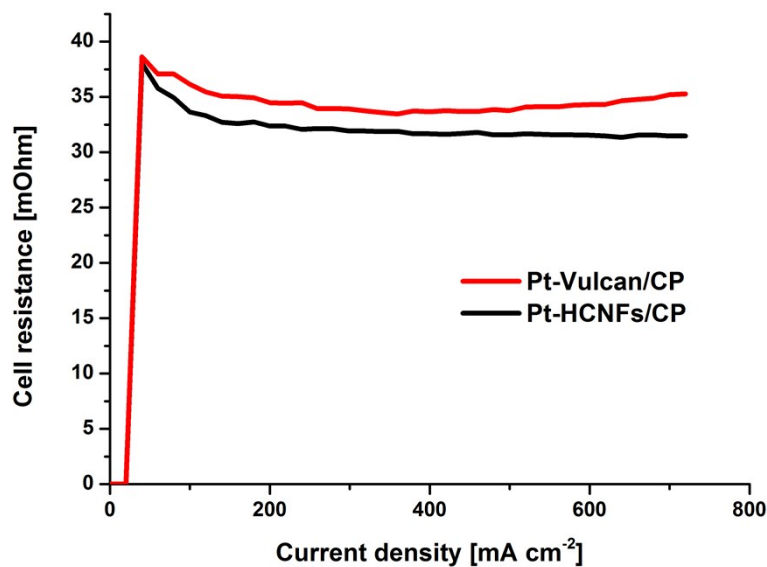

**Fig. S7.** Cell resistance as measured by simultaneous  $I$ -interrupt during recording of polarization curves.

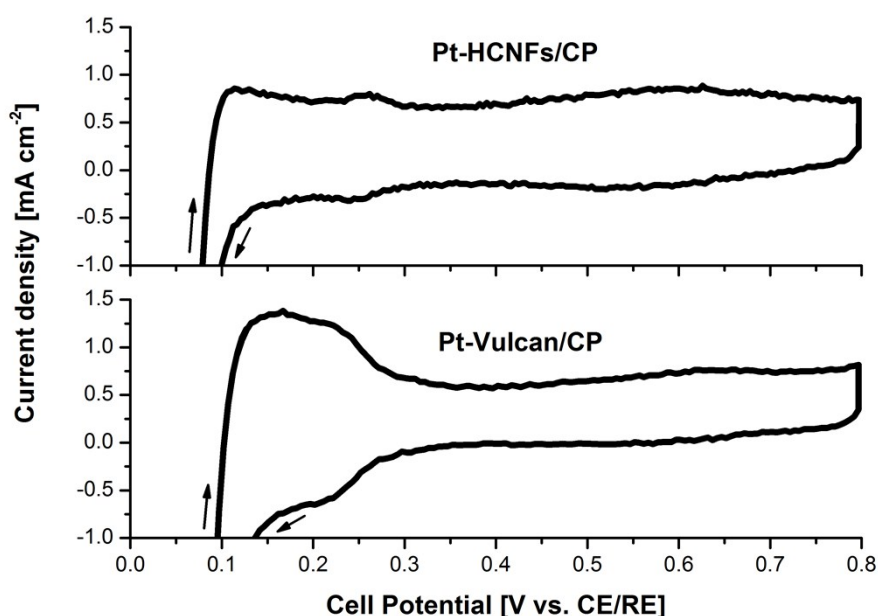

**Fig. S8.** In situ ECSA measured under  $N_2$  saturated cathode with the anode used as counter and reference electrode under  $H_2$  flow. Several CV's were recorded until reaching stable performance where cycling conditions were varied such that low fluctuations in current (noise) were reached. Presented curves are here recorded with  $40 \text{ mV s}^{-1}$  and  $50 \text{ mV s}^{-1}$  for Pt-HCNFs/CP and Pt-Vulcan/CP respectively.  $H_{UPD}$  Integration limited by the onset of  $H_2$  evolution yields roughly  $15.0 \text{ m}^2/\text{g}_{Pt}$  and  $7.5 \text{ m}^2/\text{g}_{Pt}$  for Pt-Vulcan/CP and Pt-HCNFs/CP respectively.

**Table S1.** Summary of electrochemical data including EIS circuit fit, ECSA (in situ) and ECSA (ex situ). The ex situ ECSA could be measured in a conventional manner for the commercial catalyst for comparison purposes (shown in parenthesis). The real Pt utilization factors are calculated according to equation S1.

| Sample       | EIS fit<br>(chi-square) | $R_s + R_{ele}$<br>[ $\Omega$ ] | $R_{CT}$<br>[ $\Omega$ ] | CPE<br>[mF] | ECSA (in<br>situ), $\text{m}^2$<br>$\text{g}^{-1}$ | ECSA (ex<br>situ), $\text{m}^2$<br>$\text{g}^{-1}$<br>(actual) | Utilization<br>factor | Real<br>utilization<br>factor |
|--------------|-------------------------|---------------------------------|--------------------------|-------------|----------------------------------------------------|----------------------------------------------------------------|-----------------------|-------------------------------|
| Pt-Vulcan/CP | 0.00030                 | 346                             | 40000                    | 0.58        | 15.0                                               | 37.9<br>(68.0)                                                 | 0.40                  | 0.0032                        |
| Pt-HCNFs/CP  | 0.00029                 | 209                             | 25000                    | 1.83        | 7.5                                                | 11.1                                                           | 0.68                  | 0.0013                        |

The real catalyst utilization ( $U_{Pt}$ ) was calculated by

$$U_{Pt} = \frac{N_s}{N_t} * 100, \quad (S1)$$

where  $N_s$  is the number of exposed surface atoms measured via the ex situ ECSA and  $N_t$  is the total number of Pt atoms within the electrode directly estimated through the Pt loading.

### **References**

[1] F. Nitze, H.R. Barzegar, T. Wagberg, *Phys. Status Solidi B-Basic Solid State Phys.*, 249 (2012) 2588-2591.
